# Supplementary material for: O-fucosylation stabilizes the TSR3 motif in thrombospondin-1 by interacting with nearby amino acids and protecting a disulfide bond
Source: PubMed Central journal article supplement (PMC9198472; doi:10.1016/j.jbc.2022.102047), 2022-05-18
Supplement: mmc1.pdf [file mmc1.pdf]

Supporting Information for:

***O*-Fucosylation stabilizes the TSR3 motif in thrombospondin-1 by interacting with nearby amino acids and protecting a disulfide bond**

Steven J. Berardinelli, Alexander Eletsy, Jessika Valero-González, Atsuko Ito, Rajashri Manjunath, Ramon Hurtado-Guerrero, James H. Prestegard, Robert J. Woods, and Robert S. Haltiwanger

**Contents:**

**Tables S1-S5**

**Figures S1-S4**

| O-fucosylated TSR1-2-3 form from human thrombospondin 1 |                         |
|---------------------------------------------------------|-------------------------|
| <b>Data collection</b>                                  |                         |
| Space group                                             | C222 <sub>1</sub>       |
| Cell dimensions                                         |                         |
| <i>a</i> , <i>b</i> , <i>c</i> (Å)                      | 66.15, 85.20, 62.12     |
| $\alpha$ , $\beta$ , $\gamma$ (°)                       | 90, 90, 90              |
| Resolution (Å)                                          | 20-2.60<br>(2.74-2.60*) |
| R <sub>merge</sub>                                      | 0.197 (0.859)           |
| R <sub>pim</sub>                                        | 0.073 (0.317)           |
| <i>I</i> / $\sigma$ <i>I</i>                            | 6.2 (2.7)               |
| Completeness (%)                                        | 99.8 (100)              |
| Redundancy                                              | 8.3 (8.2)               |
| Mn(I) half-set correlation                              | 0.987 (0.871)           |
| CC(1/2)                                                 |                         |
| <b>Refinement</b>                                       |                         |
| Resolution (Å)                                          | 2.60                    |
| No. reflections                                         | 46810                   |
| R <sub>work</sub> / R <sub>free</sub>                   | 0.249/0.316             |
| No. atoms                                               |                         |
| Protein                                                 | 856                     |
| Fucose                                                  | 22                      |
| Ethylenglycol                                           | 4                       |
| Waters                                                  | 22                      |
| <i>B</i> -factors (Å <sup>2</sup> )                     |                         |
| Protein                                                 | 70.55                   |
| Fucose                                                  | 86.95                   |
| Ethylenglycol                                           | 82.9                    |
| Waters <sup>+</sup>                                     | 60.73                   |
| R.m.s. deviations                                       |                         |
| Bond lengths (Å)                                        | 0.0127                  |
| Bond angles (°)                                         | 1.7379                  |

**Table S1: Data collection and refinement statistics for O-fucosylated hTSP1-TSR1-3.** A list of data collection parameters and refinement statistics for the crystal structure shown in Fig.1B. One crystal was used to determine the crystal structure. \*Values in parentheses are for the highest-resolution shell.

| Name           | Isotope Labeling                                                     | Tube size | Vol. [ul] | Conc. [uM] |
|----------------|----------------------------------------------------------------------|-----------|-----------|------------|
| TSR3NC         | [U- <sup>13</sup> C, <sup>15</sup> N]-TSR3                           | 3 mm      | 90        | 720        |
| TSR3NC-Fuc     | [U- <sup>13</sup> C, <sup>15</sup> N]-TSR3, [U- <sup>13</sup> C]-Fuc | 3 mm      | 90        | 260        |
| TSR3NC2        | [U- <sup>13</sup> C, <sup>15</sup> N]-TSR3                           | 3 mm      | 96        | 360        |
| TSR3NC2-Fuc    | [U- <sup>13</sup> C, <sup>15</sup> N]-TSR3                           | 5 mm      | 300       | 240        |
| TSR3NC2-GlcFuc | [U- <sup>13</sup> C, <sup>15</sup> N]-TSR3                           | 5 mm      | 300       | 240        |

**Table S2: Isotope labeled TSR3 samples for NMR spectroscopy**

| Sample                                            | NMR Spectrum                                      | B <sub>0</sub> [MHz] <sup>a)</sup>         | Probe type <sup>b)</sup> |
|---------------------------------------------------|---------------------------------------------------|--------------------------------------------|--------------------------|
| TSR3NC                                            | 2D [ <sup>15</sup> N, <sup>1</sup> H] HSQC        | 800 V                                      | 5mm CR                   |
|                                                   | 2D [ <sup>13</sup> C, <sup>1</sup> H] CT-HSQC ali | 800 V                                      | 5mm CR                   |
|                                                   | 2D [ <sup>13</sup> C, <sup>1</sup> H] CT-HSQC aro | 800 V                                      | 5mm CR                   |
|                                                   | 3D HNCO (NUS) <sup>c)</sup>                       | 600 V                                      | 5mm CR                   |
|                                                   | 3D (HACA)CONH                                     | 600 V                                      | 5mm CR                   |
|                                                   | 3D CBCA(CO)NH                                     | 600 V                                      | 5mm CR                   |
|                                                   | 3D HNCACB                                         | 600 V                                      | 3mm CR                   |
|                                                   | 3D HBHA(CO)NH                                     | 600 V                                      | 5mm CR                   |
|                                                   | 3D (H)CCH-COSY ali                                | 800 V                                      | 5mm CR                   |
|                                                   | 3D (H)CCH-TOCSY ali                               | 800 V                                      | 5mm CR                   |
|                                                   | 3D (H)CCH-COSY aro                                | 900 V                                      | 5mm CR                   |
|                                                   | 3D <sup>15</sup> N/ <sup>13</sup> C-edited NOESY  | 800 V                                      | 5mm CR                   |
|                                                   | 3D <sup>15</sup> N-edited NOESY                   | 800 V                                      | 5mm CR                   |
|                                                   | TSR3NC2                                           | 2D [ <sup>15</sup> N, <sup>1</sup> H] HSQC | 900 B                    |
| 2D [ <sup>13</sup> C, <sup>1</sup> H] CT-HSQC ali |                                                   | 900 B                                      | 5mm CR                   |
| TSR3NC-Fuc                                        | 2D [ <sup>15</sup> N, <sup>1</sup> H] HSQC        | 900 V                                      | 5mm CR                   |
|                                                   | 2D [ <sup>13</sup> C, <sup>1</sup> H] CT-HSQC ali | 900 V                                      | 5mm CR                   |
|                                                   | 2D [ <sup>13</sup> C, <sup>1</sup> H] CT-HSQC aro | 900 V                                      | 5mm CR                   |
|                                                   | 3D HNCO (NUS 6.25%) <sup>c)</sup>                 | 900 V                                      | 5mm CR                   |
|                                                   | 3D (HACA)CONH                                     | 900 V                                      | 5mm CR                   |
|                                                   | 3D CBCA(CO)NH (NUS 25%) <sup>c)</sup>             | 900 V                                      | 5mm CR                   |
|                                                   | 3D HNCACB                                         | 900 V                                      | 5mm CR                   |
|                                                   | 3D HBHA(CO)NH                                     | 600 V                                      | 5mm CR                   |
|                                                   | 3D (H)CCH-COSY ali                                | 900 V                                      | 5mm CR                   |
|                                                   | 3D (H)CCH-TOCSY ali                               | 900 V                                      | 5mm CR                   |
|                                                   | 3D (H)CCH-COSY aro                                | 900 V                                      | 5mm CR                   |
| 3D <sup>15</sup> N/ <sup>13</sup> C-edited NOESY  | 800 V                                             | 5mm CR                                     |                          |
| TSR3NC3-Fuc                                       | 2D [ <sup>15</sup> N, <sup>1</sup> H] HSQC        | 900 B                                      | 5mm RT                   |
|                                                   | 2D [ <sup>13</sup> C, <sup>1</sup> H] CT-HSQC ali | 900 B                                      | 5mm CR                   |
| TSR3NC3-FucGlc                                    | 2D [ <sup>15</sup> N, <sup>1</sup> H] HSQC        | 900 B                                      | 5mm RT                   |
|                                                   | 2D [ <sup>13</sup> C, <sup>1</sup> H] CT-HSQC ali | 900 B                                      | 5mm CR                   |

**Table S3: 2D and 3D NMR spectra used in resonance assignment of TSR3 glycoforms and chemical shift perturbation analysis.** a) V-Varian/Agilent; B-Bruker b) RT-room-temperature probe; CR-cryogenic probe c) Non-uniform sampling.

| Protein  | TSR No. | C5-C6 Sequence | Protein  | TSR No.  | C5-C6 Sequence | Protein   | TSR No.  | C5-C6 Sequence |         |
|----------|---------|----------------|----------|----------|----------------|-----------|----------|----------------|---------|
| ADAMTS1  | TSR1    | CNLEDCP        | ADAMTS9  | TSR6     | CELPSCCH       | ADAMTS15  | TSR3     | CVLRPC-*       |         |
|          | TSR2    | CADHPCP        |          | TSR7     | CSVTPCG        |           |          |                |         |
|          | TSR3    | CTMAECS        |          | TSR8     | CSMSPCP        |           | ADAMTS16 | TSR1           | CNSQKCP |
|          |         |                | TSR9     | CESGPCP  | TSR2           | CKVSACP   |          |                |         |
| ADAMTS2  | TSR1    | CSRQDCP        |          | TSR10    | CNTHACP*       | TSR3      |          | CNSQSCP        |         |
|          | TSR2    | CNPQECs*       |          | TSR11    | CRGGRCF        | TSR4      | CLLQRCH  |                |         |
|          | TSR3    | CSRELCP        |          | TSR12    | CQGPRCP        | TSR5      | CAPLPCP  |                |         |
|          | TSR4    | CRLGPCP        |          | TSR13    | CSLQPCP        | TSR6      | CNTHFCP  |                |         |
|          |         |                |          | TSR14    | CYLRCF         |           |          |                |         |
| ADAMTS3  | TSR1    | CNTEECQ        |          | TSR15    | CRNVYNCE*      | ADAMTS17  | TSR1     | CENLPCP        |         |
|          | TSR2    | CNIQECT*       |          |          |                |           | TSR2     | CNLHPCQ*       |         |
|          | TSR3    | CSRELCP        | ADAMTS10 | TSR1     | CNTDDCP        |           | TSR3     | CEGQDCL        |         |
|          | TSR4    | CQLPPCN        |          | TSR2     | CNTDDCP*       |           | TSR4     | CEDYSGCY*      |         |
|          |         |                |          | TSR3     | CHGPTCP        | TSR5      | CYQEVCN  |                |         |
| ADAMTS4  | TSR1    | CNTEDCP        |          | TSR4     | CNLRRCF        |           |          |                |         |
|          |         |                |          | TSR5     | CEAKCD-*       | ADAMTS18  | TSR1     | CNINPCN        |         |
| ADAMTS5# | TSR1    | CSLMPCP        |          |          |                |           | TSR2     | CNSHACP*       |         |
|          | TSR2    | CLLKKC-*       | ADAMTS12 | TSR1     | CNVHPCR        | TSR3      | CVLGRCP  |                |         |
|          |         | TSR2           |          | CHEKACP  | TSR4           | CNRRACP   |          |                |         |
| ADAMTS6  | TSR1    | CNTDPCP        |          | TSR3     | CNRDILCP*      |           | TSR5     | CNTNFCP        |         |
|          | TSR2    | CNTEPCP        |          | TSR4     | CGLQQCP        |           |          |                |         |
|          | TSR3    | CNNQSCP        |          | TSR5     | CHLRPCA        | ADAMTS19  | TSR1     | CENPPCP        |         |
|          | TSR4    | CSLGRCP*       |          | TSR6     | CNPEPCE*       |           | TSR2     | CNEQPCQ        |         |
|          | TSR5    | CESKCDs*       |          | TSR7     | CNEHLCC        |           | TSR3     | CEGQDCM        |         |
|          |         |                | TSR8     | CNQQACK  | TSR4           | CEDYSKCY* |          |                |         |
| ADAMTS7  | TSR1    | CNLQACP        |          |          |                |           | TSR5     | CHLQPCN        |         |
|          | TSR2    | CSEQPCP        | ADAMTS13 | TSR1     | CNTQACE        |           |          |                |         |
|          | TSR3    | CNRHVPCF*      |          | TSR2     | CVLEPCP        | ADAMTS20  | TSR1     | CNTDSCP        |         |
|          | TSR4    | CSLPLCR        |          | TSR3     | CNPQPCP        |           | TSR2     | CNTDCE-*       |         |
|          | TSR5    | CHLRPCA        |          | TSR4     | CVGMSCP*       |           | TSR3     | CHGNCV-*       |         |
|          | TSR6    | CGAQPCP        |          | TSR5     | CQAVPCP        |           | TSR4     | CNEFSCP        |         |
|          | TSR7    | CNTHPCT*       |          | TSR6     | CSLEPCP        |           | TSR5     | CELHTCA        |         |
|          | TSR8    | CGTEDCE*       |          | TSR7     | CLIADCT        |           | TSR6     | CVLTPCS        |         |
|          |         | TSR8           |          | CWAGPCV  | TSR7           |           | CFTPCG-* |                |         |
|          |         |                |          | TSR8     | CSLAACP        |           |          |                |         |
| ADAMTS8  | TSR1    | CHTEECF        |          |          |                | TSR9      | CGPGPCP  |                |         |
|          | TSR2    | CESQLCP        | ADAMTS14 | TSR1     | CNSEECF        | TSR10     | CHMHACP  |                |         |
|          |         | TSR2           |          | CNQHPCS* | TSR11          | CRSVRCF   |          |                |         |
| ADAMTS9  | TSR1    | CNTEPCL        |          | TSR3     | CLRVPFCP       | TSR12     | CWSQDCV  |                |         |
|          | TSR2    | CGTDCC-*       |          | TSR4     | CSLPACG        | TSR13     | CRNPPCN  |                |         |
|          | TSR3    | CSGECN-*       |          |          |                | TSR14     | CINSC-*  |                |         |
|          | TSR4    | CSEFFPCP       | ADAMTS15 | TSR1     | CNLEPCP        | TSR15     | CYANDCK  |                |         |
|          | TSR5    | CQQPECA        |          | TSR2     | CGEPCP-*       |           |          |                |         |

**Table S4: List of sequences between C5 and C6 of all TSRs from the ADAMTS superfamily.**

Table 1 was created using all the TSRs from human ADAMTS proteins in the above table except for TSRs labeled with an asterisk. TSRs with an asterisk were not used because a) they did not have a predicted consensus sequence for *O*-fucosylation, b) they had more than four amino acids between C5 and C6, c) they had less than four amino acids between C5 and C6, or d) if the C6 of the TSR terminated a protein sequence. ADAMTS5 is denoted with a hashtag (#) indicating that ADAMTS5 and ADAMTS11 are the same proteins which is why ADAMTS11 is not listed in the table.

| TSR3 Mutation | Primer  | Sequence (5' → 3')                                       |
|---------------|---------|----------------------------------------------------------|
| I503A         | Forward | ATGGGACg <sub>c</sub> CTGTTCTGTCACCTGTGGA                |
|               | Reverse | AGAACAGg <sub>c</sub> GTCCCATGGTGACCAAGGA                |
| V506A         | Forward | TCTGTTCTG <sub>c</sub> CACCTGTGGAGGAGGGGTA               |
|               | Reverse | CCACAGGTG <sub>g</sub> CAGAACAGATGTCCCATGGT              |
| V512A         | Forward | GGAGGAGGGG <sub>c</sub> ACAGAAACGTAGTCGTCCTGCAAC         |
|               | Reverse | ACGTTTCTGT <sub>g</sub> CCCCTCCTCACAGGTGACAGAACA         |
| N542A         | Forward | AGATCTGC <sub>g</sub> cCAAGCAGGACTGTCCAATTCTCGAGC        |
|               | Reverse | CCTGCTTG <sub>g</sub> cGCAGATCTGGTTTTCTGTTACATCAC        |
| D545A         | Forward | GAAACCAGATCTGCAACAAGCAGG <sub>c</sub> gTGTCCAATTCTCGAGCA |
|               | Reverse | GAATTGGACA <sub>c</sub> gCCTGCTTGTTCAGATCTGGTTTTTC       |
| P547A         | Forward | GCAGGACTGTGCAATTCTCGAGCACCACCAC                          |
|               | Reverse | TCGAGAATTGCACAGTCCTGCTTGTTCAGATCTG                       |

**Table S5: List of primer pairs for site-directed mutagenesis.** All primer pairs are shown for site-directed mutagenesis of TSP1-TSR3 mutant constructs used in unfolding assays in Fig. 5 and for POFUT2 enzyme assays in Fig. S3. The lower-case letters denote which nucleotides were mutated from the wild type construct.

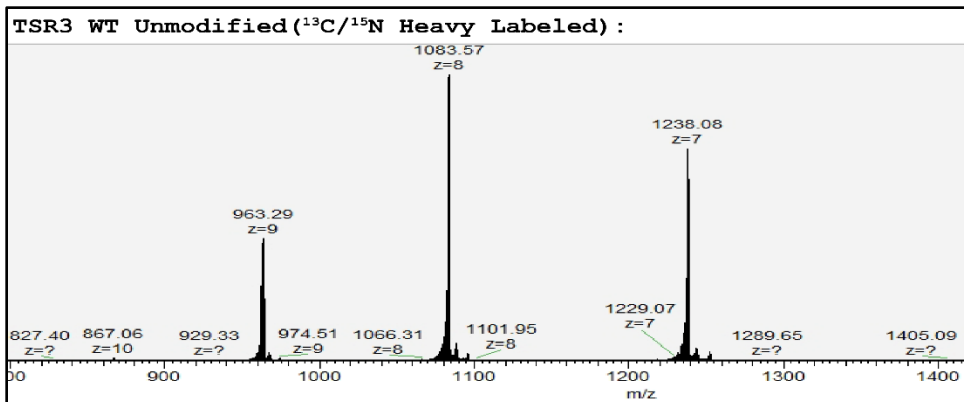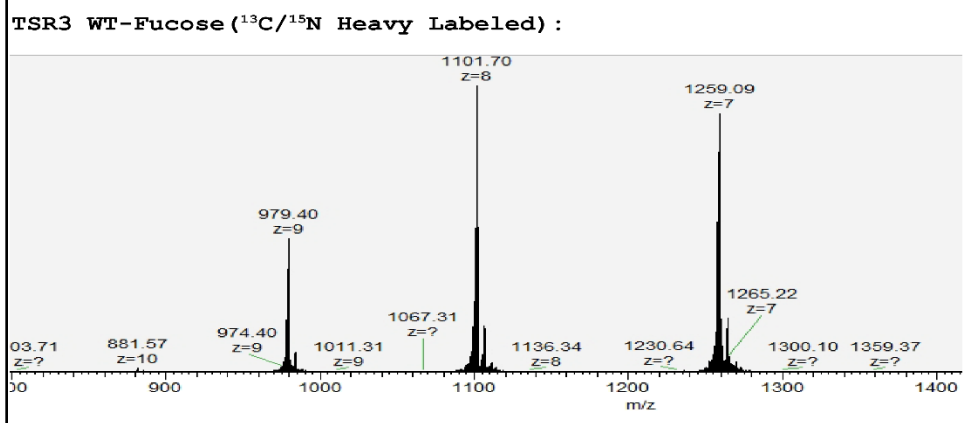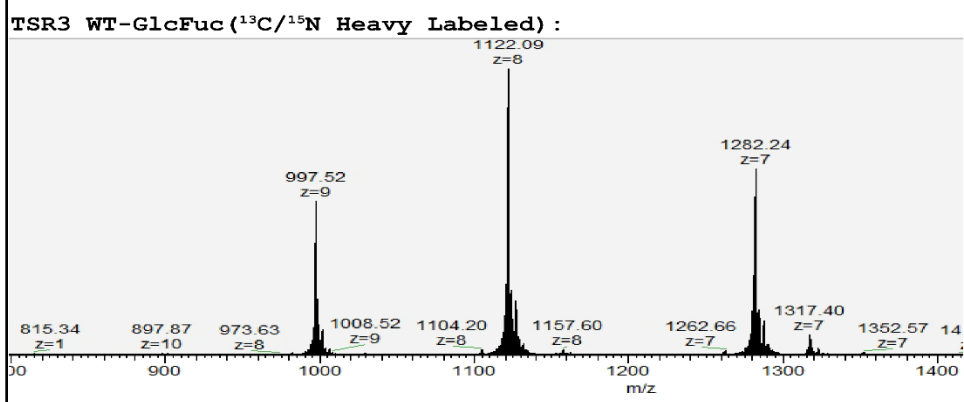

| Charge State | Unmodified                       |                                  | Fuc                              |                                  | GlcFuc                           |                                  |
|--------------|----------------------------------|----------------------------------|----------------------------------|----------------------------------|----------------------------------|----------------------------------|
|              | <sup>12</sup> C/ <sup>14</sup> N | <sup>13</sup> C/ <sup>15</sup> N | <sup>12</sup> C/ <sup>14</sup> N | <sup>13</sup> C/ <sup>15</sup> N | <sup>12</sup> C/ <sup>14</sup> N | <sup>13</sup> C/ <sup>15</sup> N |
| 6            | 1369.46                          | 1445.93                          | 1393.80                          | 1470.27                          | 1420.81                          | 1497.28                          |
| 7            | 1173.96                          | 1239.51                          | 1194.83                          | 1260.37                          | 1217.98                          | 1283.53                          |
| 8            | 1027.34                          | 1084.70                          | 1045.60                          | 1102.95                          | 1065.86                          | 1123.21                          |
| 9            | 913.304                          | 964.29                           | 929.53                           | 980.51                           | 947.54                           | 998.52                           |

**Figure S1: NanoLC-MS analysis of unmodified and O-fucose modifications of  $^{13}\text{C}/^{15}\text{N}$ -labeled human TSP1-TSR3 for NMR studies.** LC-MS analysis shows that the expressed TSR3 proteins used for NMR studies in Fig. 2A and Fig. 3A were nearly completely labeled with  $^{13}\text{C}/^{15}\text{N}$ . A table under the spectra shows the theoretical mass-to-charge ratios for unlabeled ( $^{12}\text{C}/^{14}\text{N}$ ) and heavy labeled ( $^{13}\text{C}/^{15}\text{N}$ ) TSR3 for comparison. The  $^{13}\text{C}/^{15}\text{N}$  labeled TSR3 was then modified *in vitro* with fucose monosaccharide and glucose-fucose disaccharide as described in Experimental Procedures. After modification and purification, samples were analyzed by nanoLC-MS to show that the labeled TSR3 was fully modified with O-fucose glycans. Spectra are shown for each glycoform (unmodified, fucose modified and glucose-fucose modified). Peaks of the most abundant charge states are shown, which were mainly charge states 7-9.



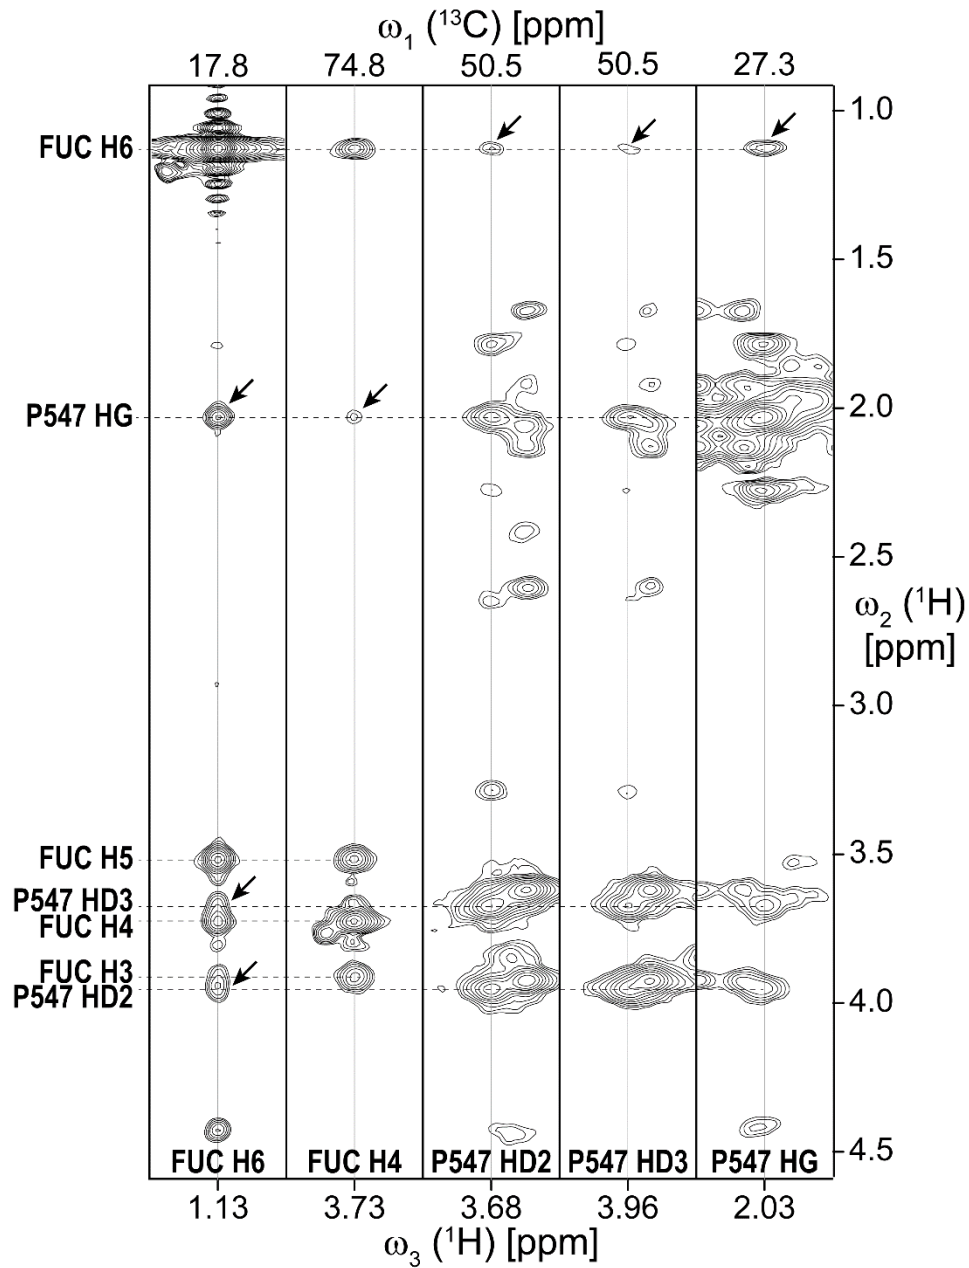

**Figure S2: Strip plot of 3D  $^{13}\text{C}$ -edited  $[^1\text{H}, ^1\text{H}]$  NOESY spectrum for selected resonances of *O*-fucose and Pro547 of TSR3-Fuc.** Arrows indicate NOE cross-peaks between H4 and H6 (methyl) resonances of *O*-fucose, and HD2, HD3 and HG resonances of Pro547. In the *O*-fucose H6 strip these cross peaks overlap with H6-H4 and H6-H3 cross peaks. HD2 and HD3 resonance assignments are not stereospecific, HG represents both HG2 and HG3 spins due to chemical shift degeneracy.

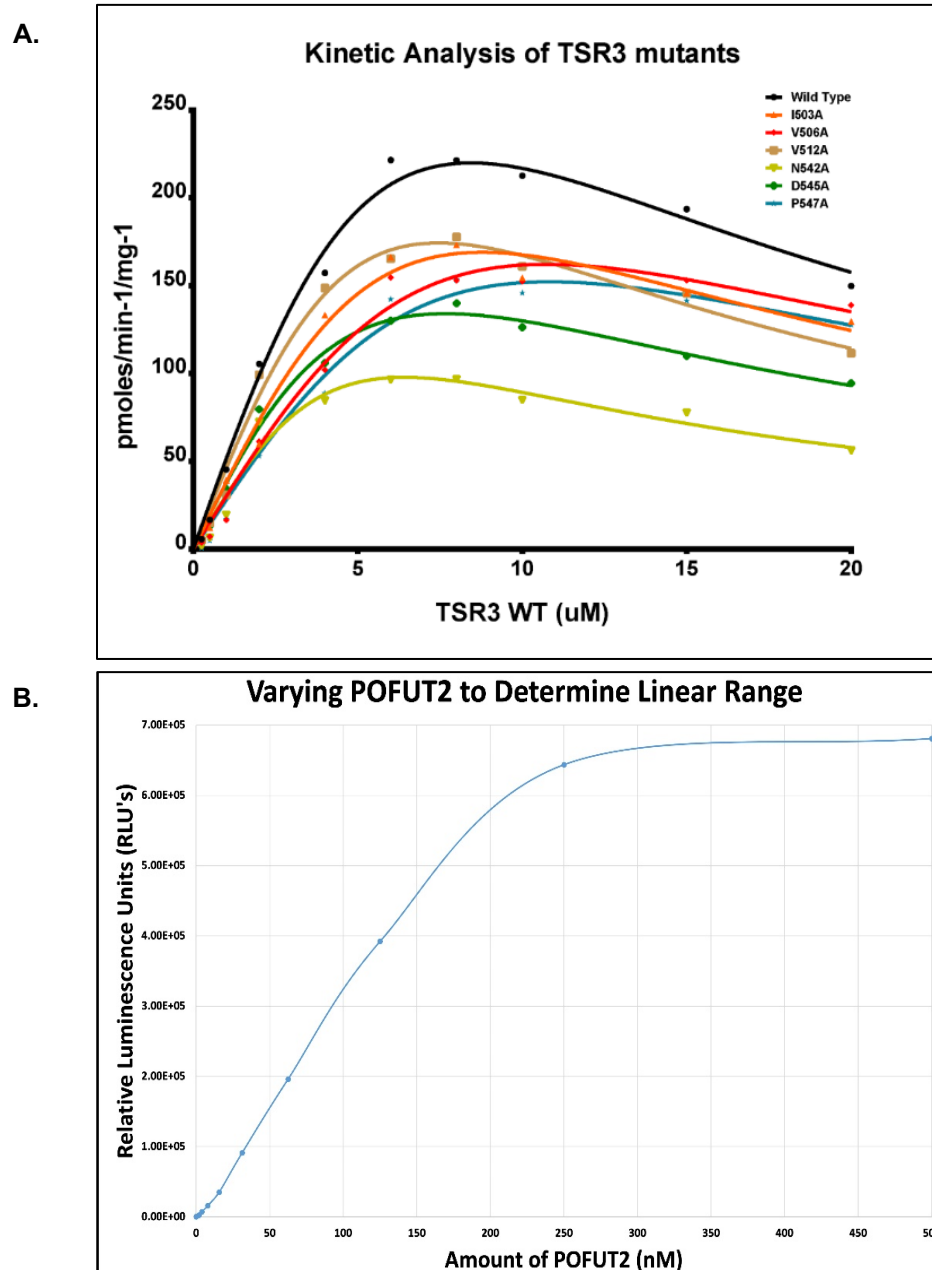

**Figure S3: Analysis of wild type TSR3 and mutants as POFUT2 substrates.** GDP-Glo assays (Promega®) were used to determine if TSR3 mutants were poor substrates for POFUT2 when compared to wild type. **(A)** Kinetic analysis showing that all TSR3 mutants are poorer substrates for POFUT2 than wild type. The curves were generated in Prism using a substrate saturation fit since either product or substrate inhibition was observed when using high concentrations of TSRs. **(B)** Linear range of POFUT2 to use for the assays. Once determining the linear range, 50 nM of POFUT2 was used for the data in panel A.

**A: WT TSR3**

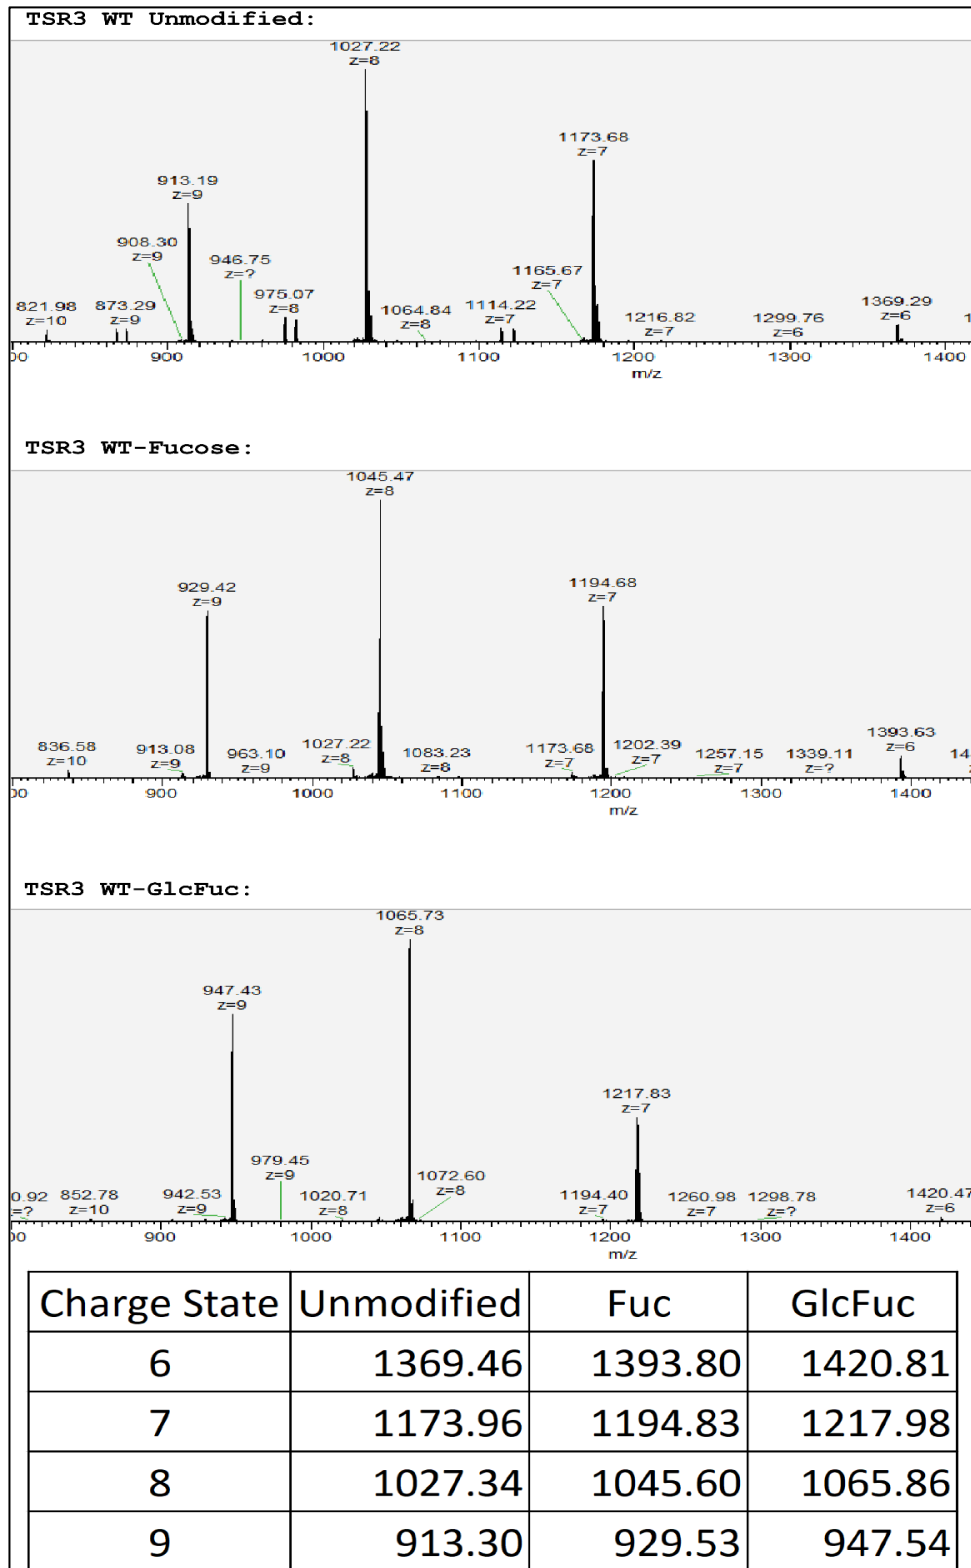

**B: I503A mutant**

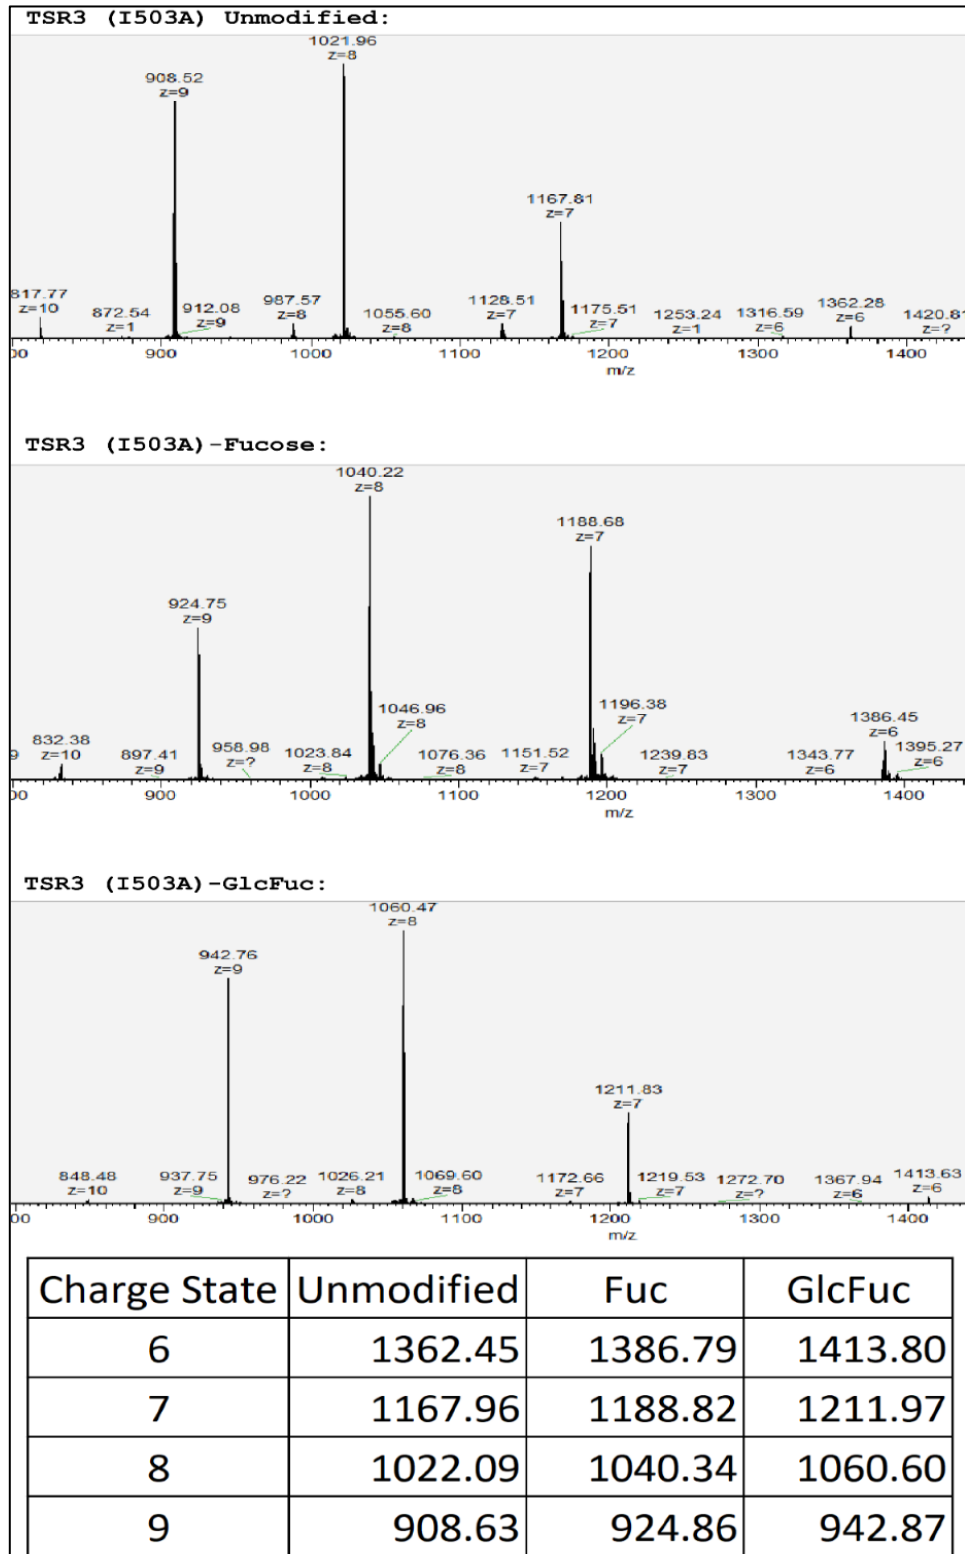

**C: V506A mutant**

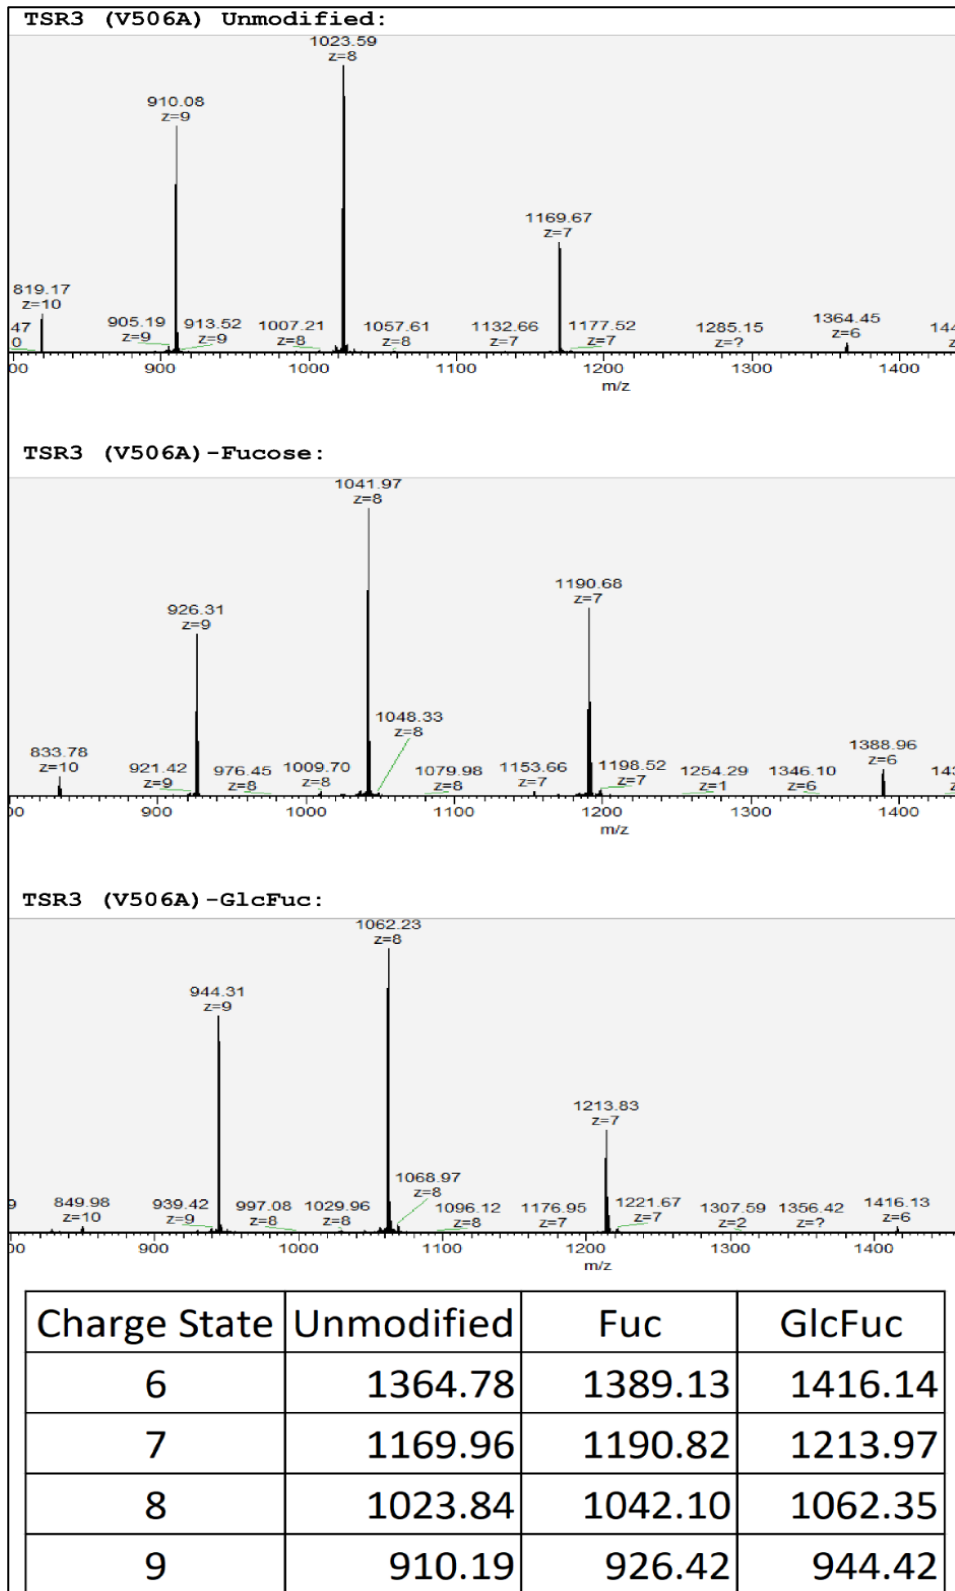

D: V512A mutant

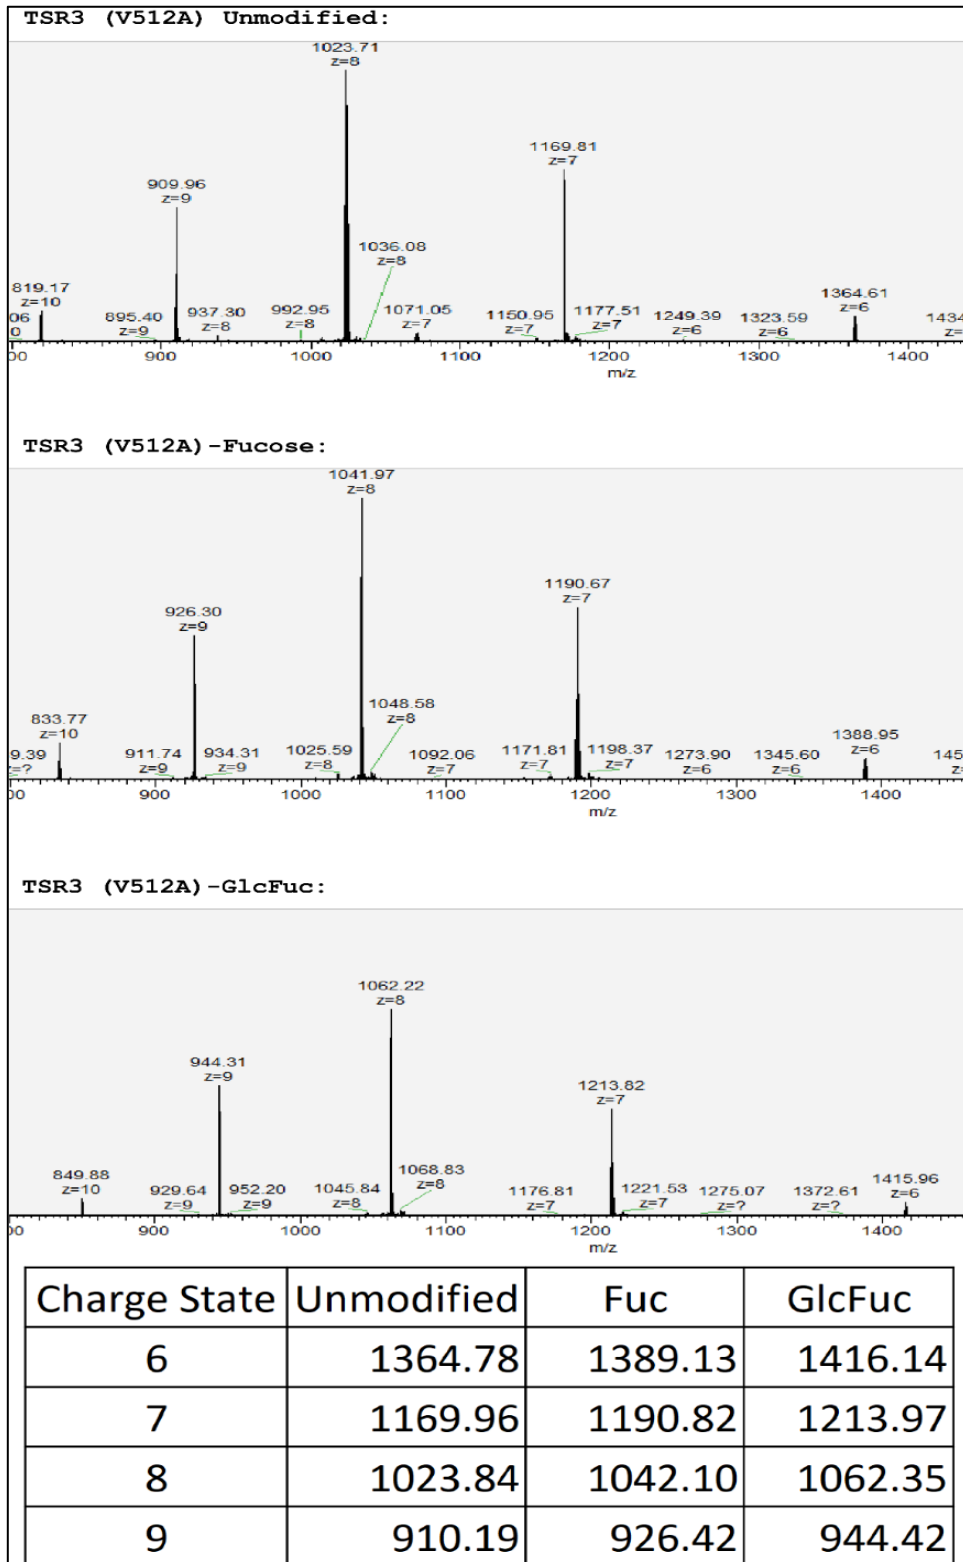

E: N542A mutant

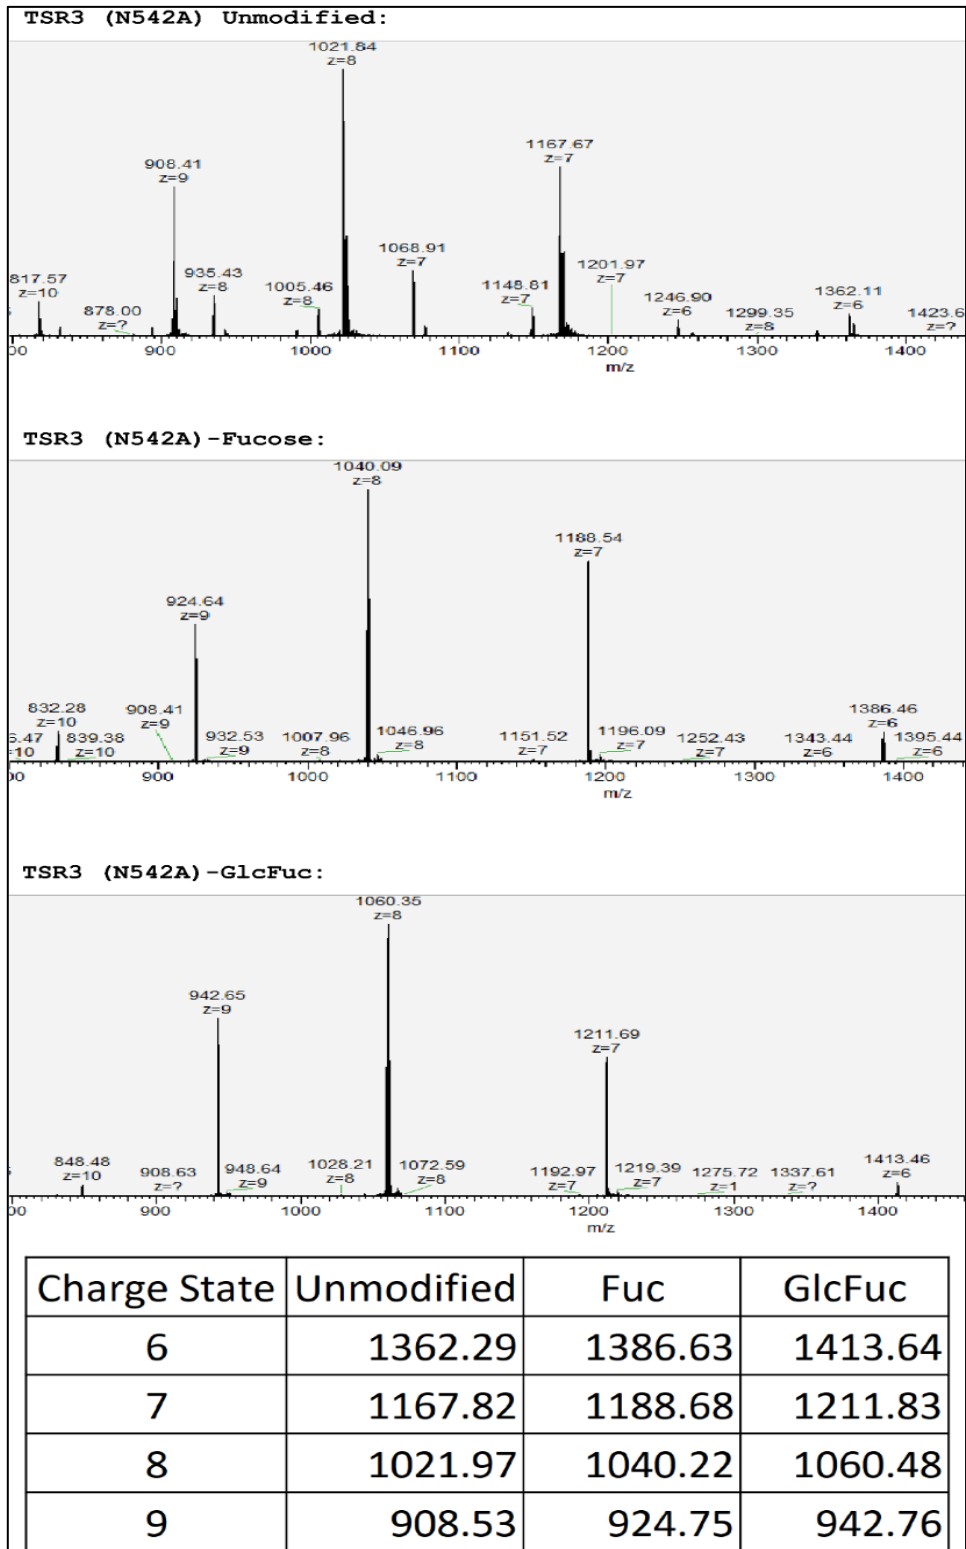

F: D545A mutant

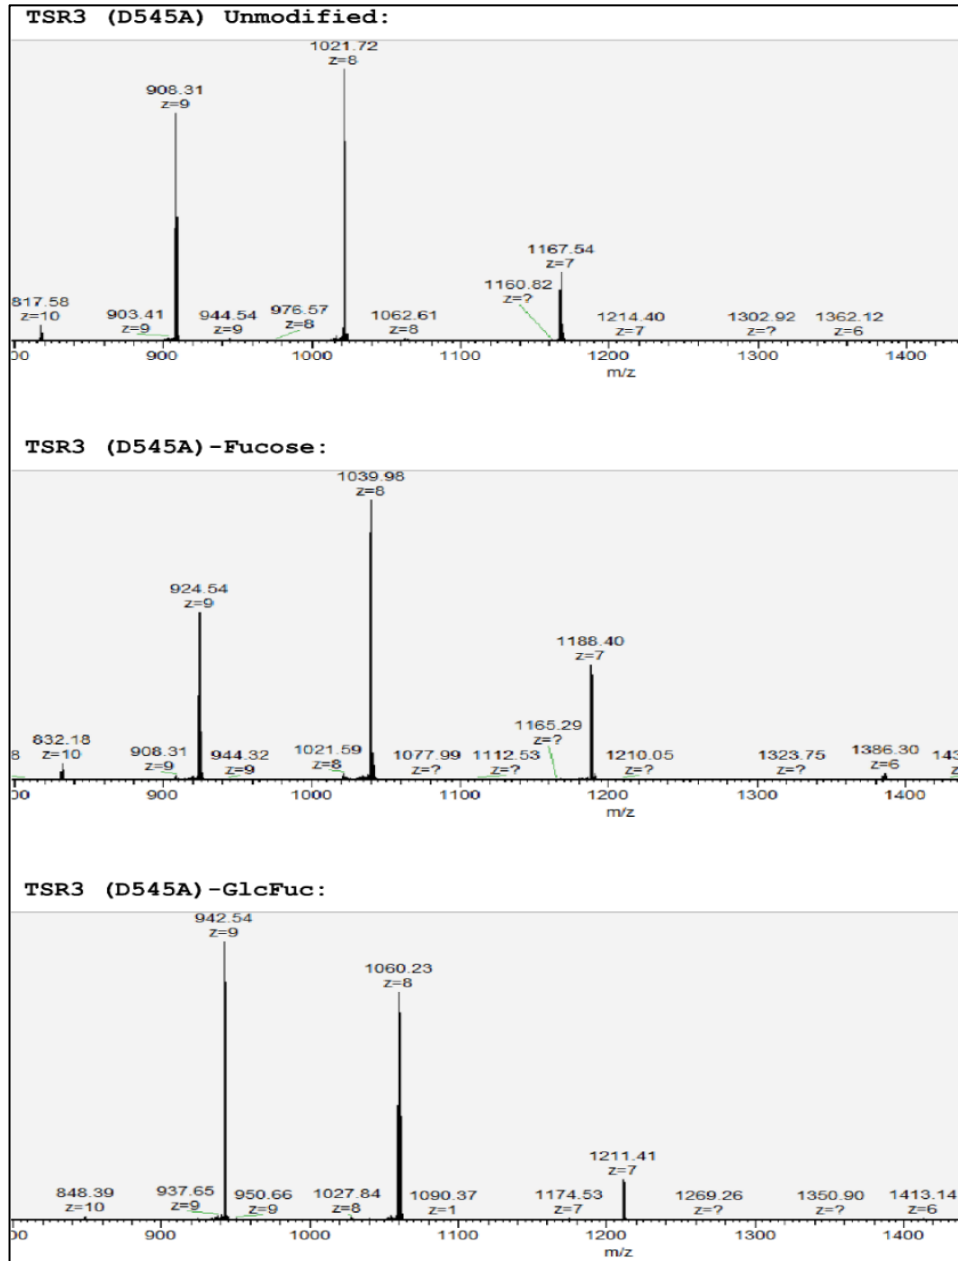

| Charge State | Unmodified | Fuc     | GlcFuc  |
|--------------|------------|---------|---------|
| 6            | 1362.12    | 1386.47 | 1413.48 |
| 7            | 1167.68    | 1188.54 | 1211.69 |
| 8            | 1021.84    | 1040.10 | 1060.36 |
| 9            | 908.42     | 924.65  | 942.65  |



**G: P547A mutant**

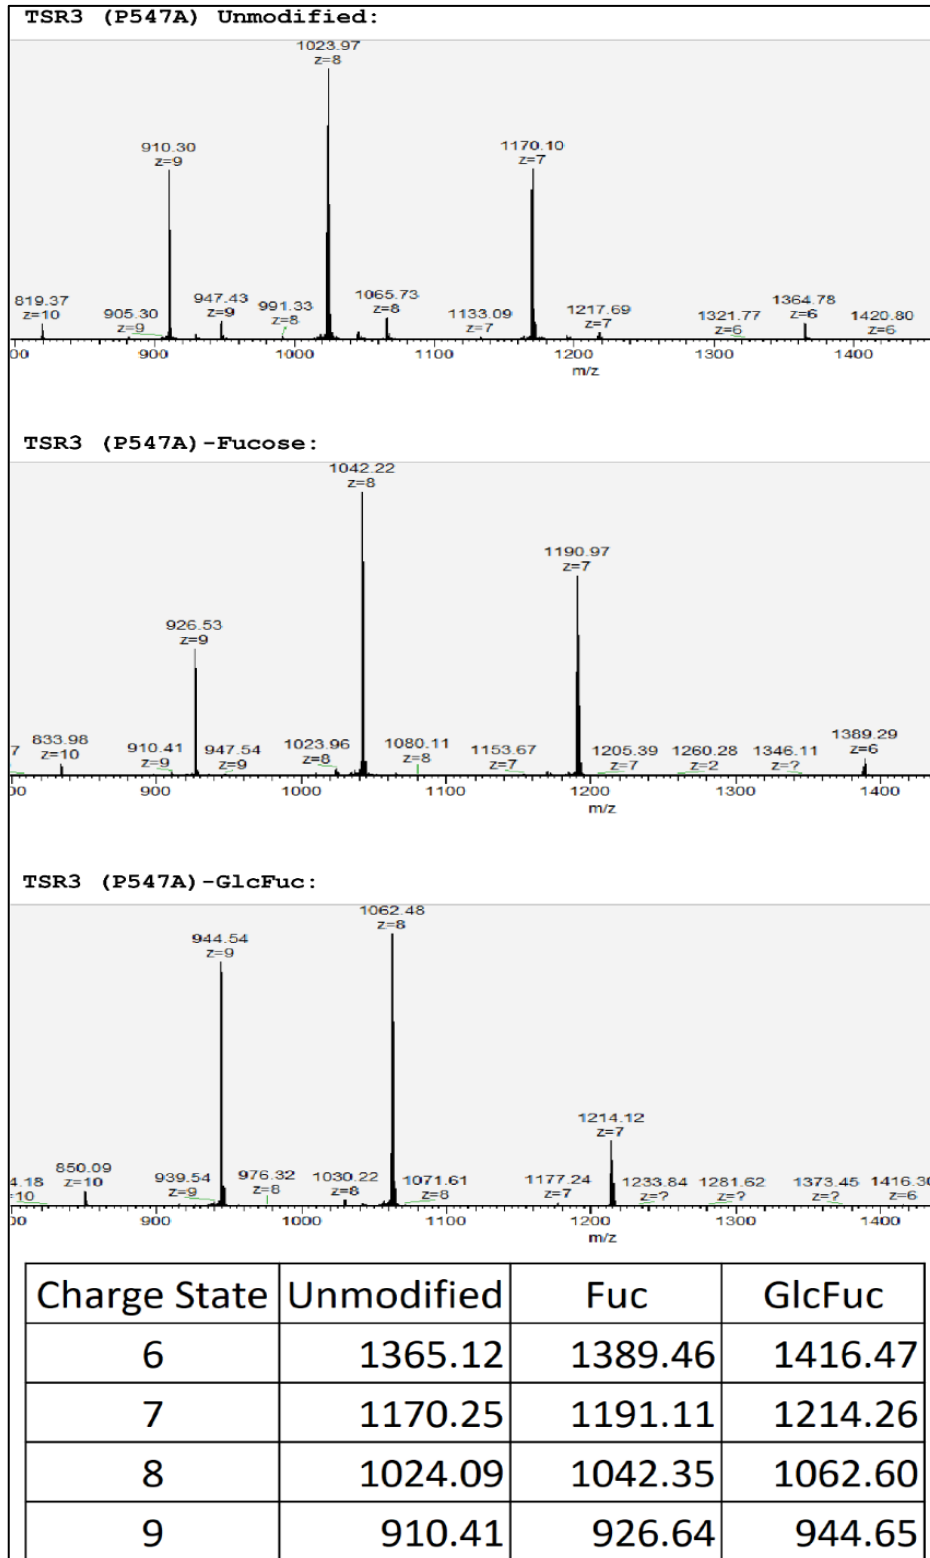

**Figure S4: NanoLC-MS analysis of unmodified and O-fucose modifications of WT and mutant TSRs.** Wild type TSP1-TSR3 and mutants were modified *in vitro* with fucose monosaccharide and glucose-fucose disaccharide for reductive unfolding assays shown in Fig. 5. After modification and purification, samples were analyzed by LC-MS to show that all TSRs were fully modified. For each construct (wild type and mutants), spectra are shown for each glycoform (unmodified, fucose modified and glucose-fucose modified). Peaks of the most abundant charge states are shown, which were mainly charge states 6-9. A table under each mutant spectra shows the theoretical mass-to-charge ratios for wild type and mutant TSR3. **(A)** WT; **(B)** I503A mutant; **(C)** V506A mutant; **(D)** V512A mutant; **(E)** N542A mutant; **(F)** D545A mutant; **(G)** P547A mutant.
